# Supplementary material for: Robust chemical bonding of PMMA microfluidic devices to porous PETE membranes for reliable cytotoxicity testing of drugs
Source: Royal Society of Chemistry journal article supplement (doi:10.1039/c9lc00338j), 2019-01-01

## **Electronic Supplementary Information (ESI) for Lab on a Chip**

### **Robust chemical bonding of PMMA microfluidic devices to porous PETE membranes for reliable cytotoxicity tests of drugs**

Thao Nguyen<sup>a,‡</sup>, Su Hyun Jung<sup>a,‡</sup>, Min Seok Lee<sup>a</sup>, Tae-Eun Park<sup>a</sup>, Suk-kyun Ahn<sup>b,\*</sup>, and Joo H. Kang<sup>a,\*</sup>

<sup>a</sup> Department of Biomedical Engineering, School of Life Sciences, Ulsan National Institute of Science and Technology (UNIST), 50 UNIST-gil, Eonyang-eup, Ulju-gun, Ulsan, Republic of Korea 44919.

<sup>b</sup> Department of Polymer Science and Engineering, Pusan National University, Busan, Republic of Korea 46241.

#### **SUPPLEMENTARY FIGURE LEGENDS**

**Fig. S1** Contact angle measurement of bare, air plasma – treated, and GLYMO-treated PETE membranes, respectively.

**Fig. S2** (A) The XPS spectra of the GLYMO - treated PETE membrane. (B) The SiC bond is derived from the GLYMO molecules. (C), (D) The C 1s and O 1s spectra showing multiple peaks represent polyester on the PETE surface. (E) The Si 2s and Si 2p peaks appeared because of the silane coupling reaction.

**Fig. S3** The SEM images of the bare PETE membranes, air plasma-treated, and GLYMO - treated PETE membranes. Scale bar, 100  $\mu\text{m}$  in (A), (D), (G); 50  $\mu\text{m}$  in (B), (E), (H); 10  $\mu\text{m}$  in (C), (F), (I).

**Fig. S4** (A) A rhodamine B dye solution was perfused through the PDMS-PETE and PMMA-PETE channel for 4 to 16 hours. The fluorescence images taken from the top view depict diffusion of the dye solution from the channel to the substrates at each different time point. Neither PMMA nor PETE absorbed the rhodamine B dye while the PDMS significantly absorbed the dye. The fluorescence intensity of the PETE membrane (bottom panel of A) was measured after washing out the channel with a buffer solution to remove residual rhodamine B dyes in the channel. Scale bar: 200  $\mu\text{m}$ . (B) The quantitative comparison of rhodamine B absorbed into the PDMS channel, the PMMA channel, and the PETE membrane, respectively.

**Fig. S5** HUVEC cells were cultured in the PMMA device for 5 days. Hoechst (left) and PI (right) staining of the cells on day 5 showing high cell viability ( $>97.46 \pm 1.03\%$ ). Scale bar: 100  $\mu\text{m}$ .

**Figure S1**

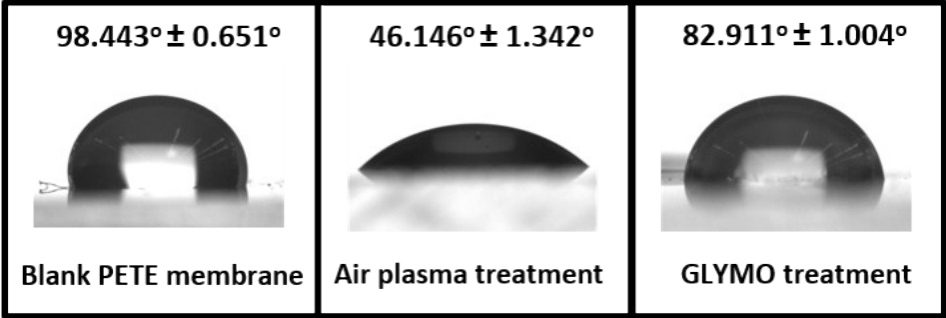

Figure S2

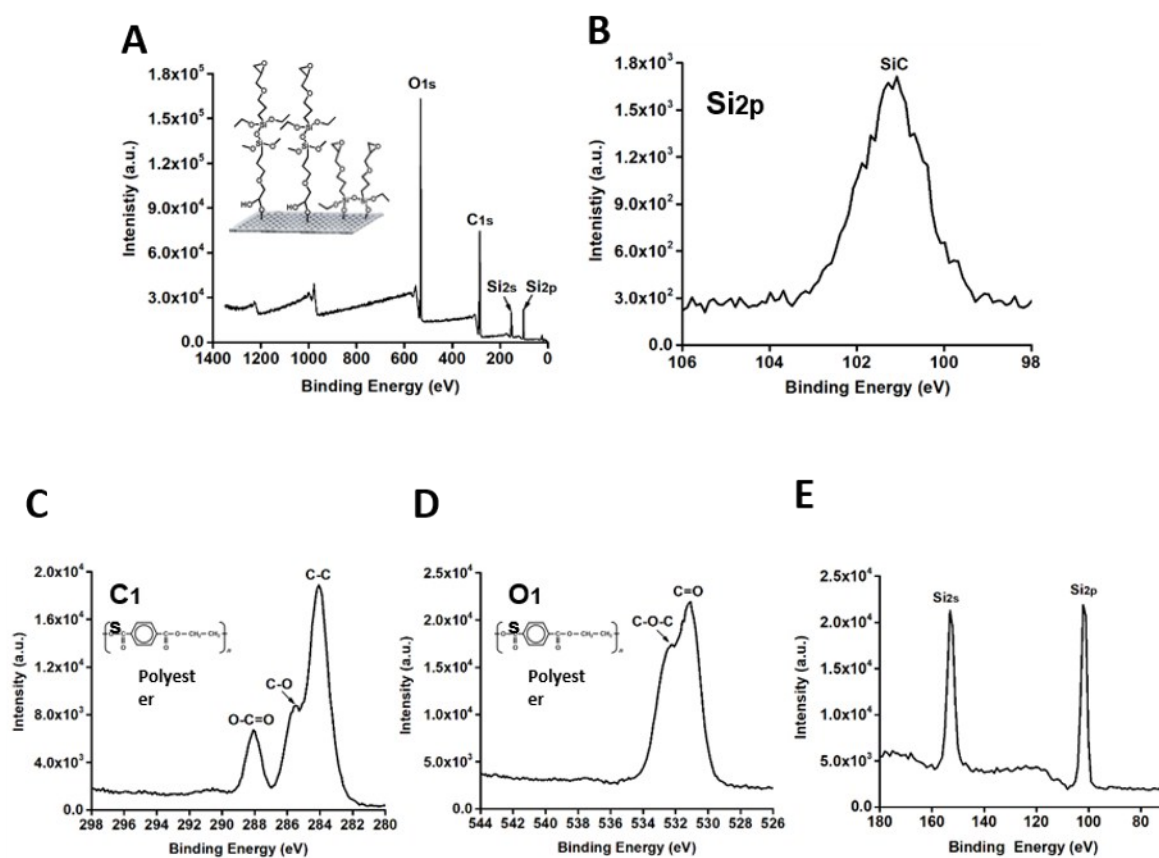

**Figure S3**

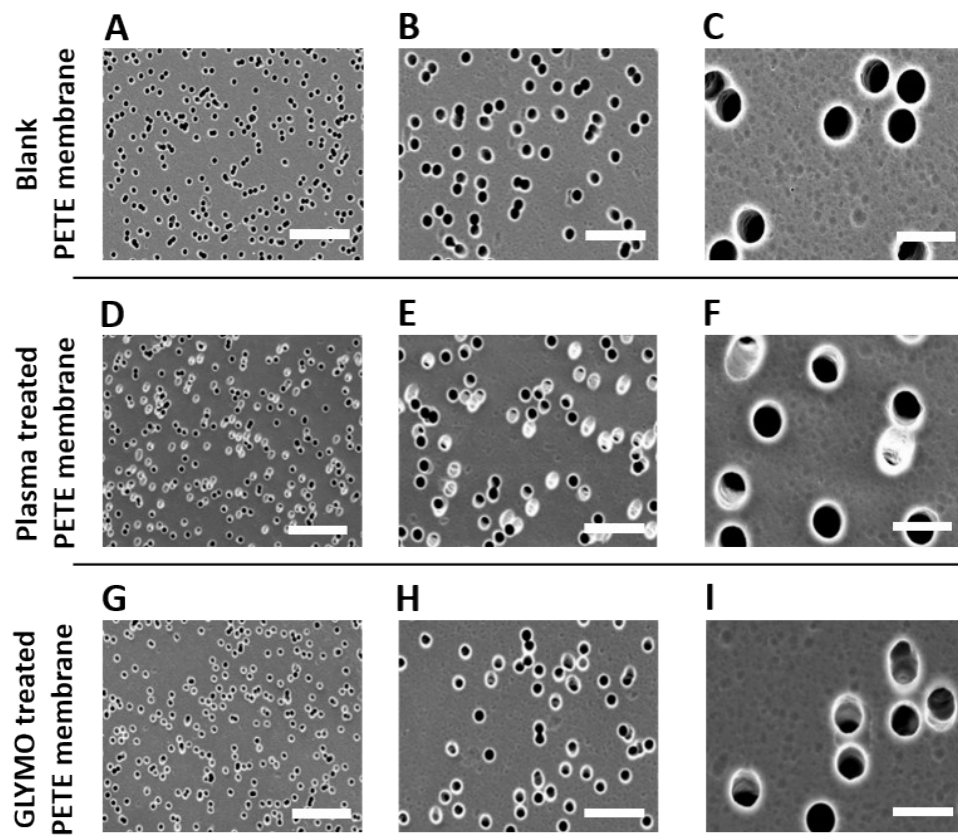

# Figure S4

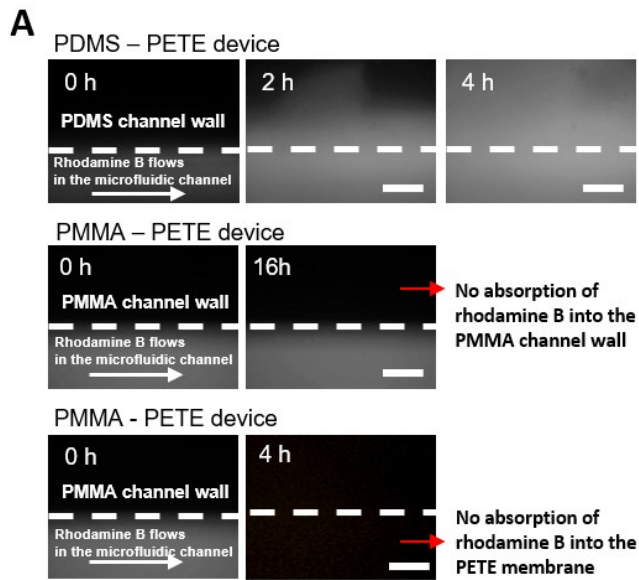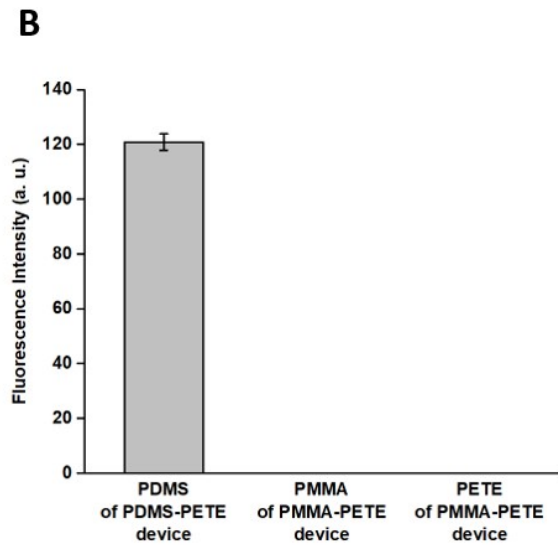

Figure S5

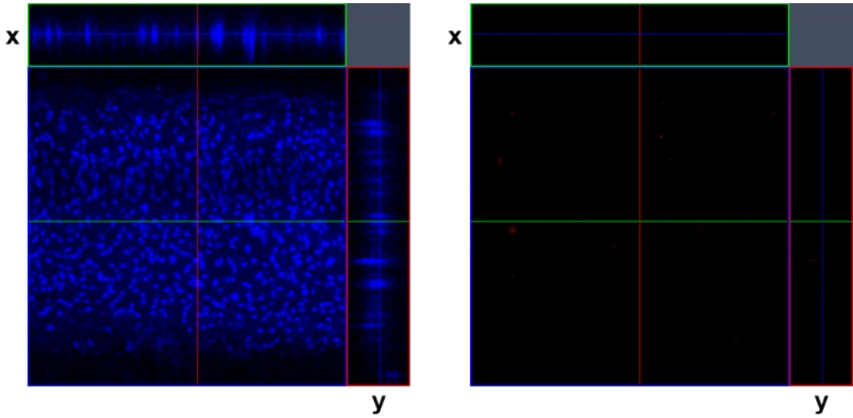

Supplement: c9lc00338j1.pdf [file c9lc00338j1.pdf]
